# Supplementary material for: Parameter optimization by using differential elimination: a general approach for introducing constraints into objective functions
Source: PubMed Central journal article supplement (PMC2982696; doi:10.1186/1752-0509-4-s2-s9), 2010-09-13

### Model 1

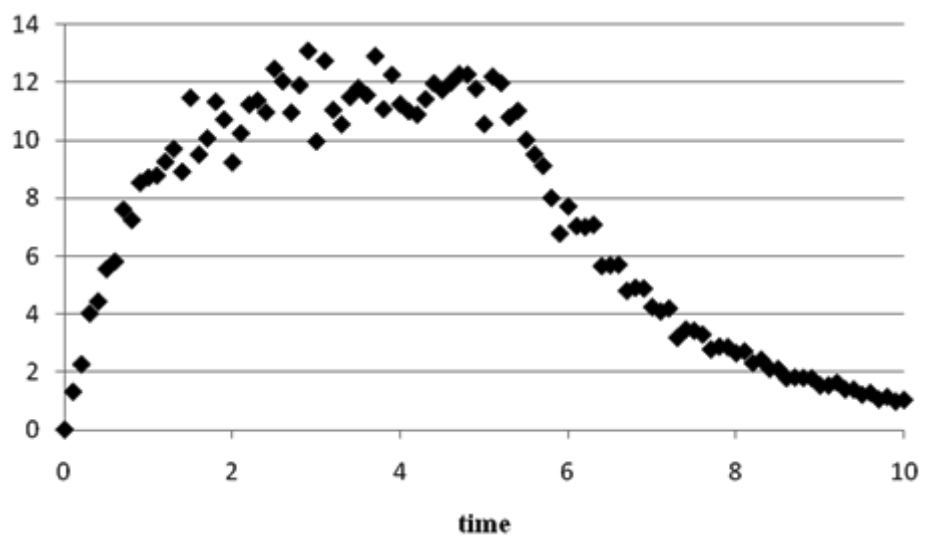

### Model 2

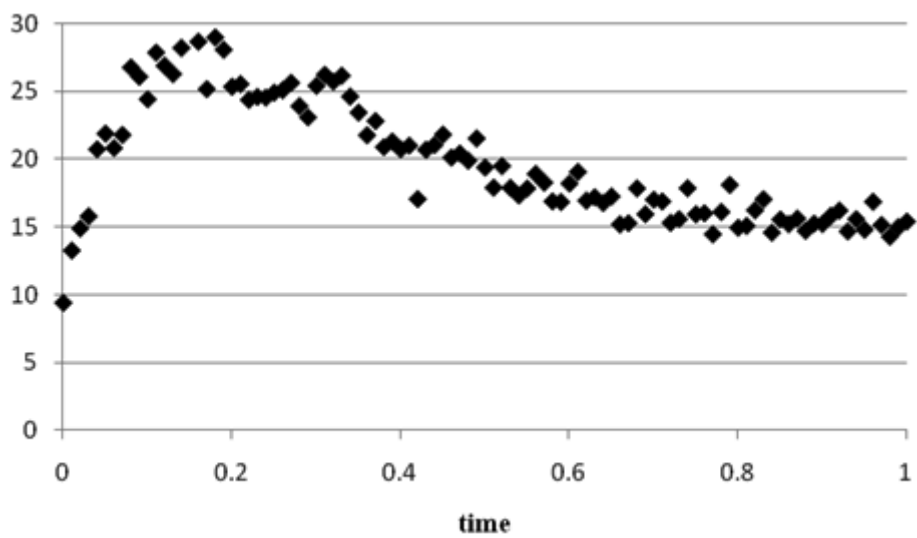

Supplement: 1752-0509-4-S2-S9-S1.pdf [file 1752-0509-4-S2-S9-S1.pdf]
