# Supplementary material for: Parameter optimization by using differential elimination: a general approach for introducing constraints into objective functions
Source: PubMed Central journal article supplement (PMC2982696; doi:10.1186/1752-0509-4-s2-s9), 2010-09-13
Supplement: 1752-0509-4-S2-S9-S2.pdf [file 1752-0509-4-S2-S9-S2.pdf]

$$C_{1,t} = \frac{\frac{d}{dt}x_{AB}(t) + k_m x_{AB}(t)}{k_p x_A} - x_B(t) = 0 \quad (1)$$

$$C_{2,t} = - \left( \frac{d}{dt}x_{AB}(t) \right) (k_m + k_p x_A) - \frac{d^2}{dt^2}x_{AB}(t) = 0 \quad (2)$$
