# Supplementary material for: Parameter optimization by using differential elimination: a general approach for introducing constraints into objective functions
Source: PubMed Central journal article supplement (PMC2982696; doi:10.1186/1752-0509-4-s2-s9), 2010-09-13
Supplement: 1752-0509-4-S2-S9-S3.pdf [file 1752-0509-4-S2-S9-S3.pdf]

$$\begin{aligned}
C_{1,t} = & (k_{21} k_{e2} (\frac{d}{dt} x_1(t)) k_{41} + k_{21} k_{41} (\frac{d}{dt} x_1(t)) k_{31}) \\
& + k_{21} k_{e2} (\frac{d}{dt} x_1(t)) k_{31} + k_{21} k_{41} k_{e1} (\frac{d}{dt} x_1(t)) + k_{21} k_{e1} (\frac{d}{dt} x_1(t)) k_{31} \\
& + k_{21} k_{e2}^2 k_{e1} x_1(t) + k_{e2}^2 k_{e1} x_1(t) k_{31} + k_{41} k_{e1} (\frac{d}{dt} x_1(t)) k_{31} \\
& + k_{41} (\frac{d}{dt} x_1(t)) k_{31} k_{e2} + k_{e2}^2 k_{e1} x_1(t) k_{41} + (\frac{d}{dt} x_1(t)) k_{e2}^3 \\
& + k_{21} k_{e2}^2 (\frac{d}{dt} x_1(t)) + k_{e2}^2 (\frac{d}{dt} x_1(t)) k_{41} + k_{e2}^3 k_{e1} x_1(t) \\
& + k_{21} k_{41} k_{e1} x_1(t) k_{31} + k_{41} k_{e2} k_{e1} x_1(t) k_{31} + k_{e2}^2 (\frac{d}{dt} x_1(t)) k_{31} \\
& + 2 k_{21} k_{e2} k_{e1} (\frac{d}{dt} x_1(t)) + 2 k_{41} k_{e2} k_{e1} (\frac{d}{dt} x_1(t)) \\
& + 2 k_{e2} k_{e1} (\frac{d}{dt} x_1(t)) k_{31} + k_{21} k_{41} k_{e2} k_{e1} x_1(t) \\
& + k_{21} k_{e2} k_{e1} x_1(t) k_{31} + 3 k_{e2}^2 k_{e1} (\frac{d}{dt} x_1(t)) + k_{e1} (\frac{d^3}{dt^3} x_1(t)) \\
& + k_{41} (\frac{d^3}{dt^3} x_1(t)) + (\frac{d^3}{dt^3} x_1(t)) k_{31} + k_{21} (\frac{d^3}{dt^3} x_1(t)) + 3 k_{e2} (\frac{d^3}{dt^3} x_1(t)) \\
& + 3 k_{e2}^2 (\frac{d^2}{dt^2} x_1(t)) + (\frac{d^4}{dt^4} x_1(t)) + k_{21} k_{41} (\frac{d^2}{dt^2} x_1(t)) + k_{21} k_{e1} (\frac{d^2}{dt^2} x_1(t)) \\
& + k_{e1} (\frac{d^2}{dt^2} x_1(t)) k_{31} + k_{41} (\frac{d^2}{dt^2} x_1(t)) k_{31} + k_{41} k_{e1} (\frac{d^2}{dt^2} x_1(t)) \\
& + k_{21} (\frac{d^2}{dt^2} x_1(t)) k_{31} + 3 k_{e2} k_{e1} (\frac{d^2}{dt^2} x_1(t)) + 2 k_{e2} (\frac{d^2}{dt^2} x_1(t)) k_{41} \\
& + 2 k_{e2} (\frac{d^2}{dt^2} x_1(t)) k_{31} + 2 k_{21} k_{e2} (\frac{d^2}{dt^2} x_1(t)) / (k_{21} k_{p2} k_{e2}^2 \\
& + k_{21} k_{31} k_{41} k_{p2} + k_{21} k_{41} k_{p2} k_{e2} + k_{21} k_{31} k_{p2} k_{e2} \\
& + k_{21} k_{41} k_{p3} k_{31} + k_{21} k_{p4} k_{e2} k_{41} + k_{21} k_{p3} k_{e2} k_{31} \\
& + k_{21} k_{p4} k_{41} k_{31} + k_{p3} k_{31} k_{e2} k_{41} + k_{p4} k_{41} k_{e2} k_{31} + k_{41} k_{e2}^2 k_{p4} \\
& + k_{31} k_{e2}^2 k_{p3}) - x_5(t) = 0
\end{aligned} \tag{1}$$

$$\begin{aligned}
C_{2,t} = & (k_{p4} k_{41}^3 k_{e2}^2 (\frac{d}{dt} x_1(t)) - k_{41}^2 k_{e2} k_{e1} x_1(t) k_{31}^2 k_{p4} \\
& - k_{21} k_{41}^2 k_{e1} (\frac{d}{dt} x_1(t)) k_{p4} k_{e2} - k_{21} k_{41}^2 k_{e1} (\frac{d}{dt} x_1(t)) k_{p4} k_{31} \\
& - k_{21} k_{e2}^2 (\frac{d}{dt} x_1(t)) k_{41}^2 k_{p4} - k_{41}^2 k_{e1} x_1(t) k_{31} k_{e2}^2 k_{p4} \\
& + k_{21} k_{e2} (\frac{d}{dt} x_1(t)) k_{31}^2 k_{p4} k_{41} + k_{21} k_{e2}^2 (\frac{d}{dt} x_1(t)) k_{31} k_{p4} k_{41} \\
& - k_{21} k_{e2} k_{e1} (\frac{d}{dt} x_1(t)) k_{p4} k_{41} k_{31} + k_{41}^2 k_{e2} k_{e1} (\frac{d}{dt} x_1(t)) k_{p4} \\
& - k_{41} k_{p4} k_{e2}^3 k_{e1} (\frac{d}{dt} x_1(t)) - k_{21}^2 k_{p4} k_{41}^2 k_{e1} (\frac{d}{dt} x_1(t)) \\
& - k_{21}^2 k_{p4} k_{41} k_{e2} k_{e1} (\frac{d}{dt} x_1(t)) - k_{21}^2 k_{p2} k_{e2}^2 k_{e1} (\frac{d}{dt} x_1(t))
\end{aligned} \tag{2}$$

$$\begin{aligned}
& -k_{21}^2 k_{31}^2 k_{p2} k_{e1} \left( \frac{d}{dt} x_1(t) \right) + k_{p4} k_{41}^3 k_{e2} k_{e1} x_1(t) k_{31} \\
& + k_{p4} k_{41}^3 k_{e2} \left( \frac{d}{dt} x_1(t) \right) k_{31} + k_{p4} k_{41}^3 k_{e1} \left( \frac{d}{dt} x_1(t) \right) k_{31} \\
& - k_{21}^2 k_{p3} k_{31}^2 k_{e1} \left( \frac{d}{dt} x_1(t) \right) - k_{21}^2 k_{p3} k_{31} k_{e2} k_{e1} \left( \frac{d}{dt} x_1(t) \right) \\
& - k_{31} k_{41}^2 k_{e1} \left( \frac{d}{dt} x_1(t) \right) k_{p4} k_{e2} - k_{31} k_{p3} k_{e2}^3 k_{e1} \left( \frac{d}{dt} x_1(t) \right) \\
& - k_{31}^2 k_{p4} k_{41}^2 k_{e1} \left( \frac{d}{dt} x_1(t) \right) - k_{31}^2 k_{p4} k_{41} k_{e2} k_{e1} \left( \frac{d}{dt} x_1(t) \right) \\
& - k_{31}^2 k_{e2}^2 k_{e1} \left( \frac{d}{dt} x_1(t) \right) k_{p3} - k_{21} k_{41}^2 \left( \frac{d}{dt} x_1(t) \right) k_{31}^2 k_{p4} \\
& + k_{21} k_{e2}^2 k_{e1} x_1(t) k_{p4} k_{41} k_{31} + k_{21}^2 k_{e1} x_1(t) k_{31}^2 k_{p4} k_{41} \\
& - k_{21} k_{31}^2 k_{e2} k_{p2} k_{e1} \left( \frac{d}{dt} x_1(t) \right) - k_{21} k_{p2} k_{e2}^3 k_{e1} \left( \frac{d}{dt} x_1(t) \right) \\
& - k_{41}^2 \left( \frac{d}{dt} x_1(t) \right) k_{31} k_{e2}^2 k_{p4} + k_{21} k_{e2} k_{e1} x_1(t) k_{31}^2 k_{p4} k_{41} \\
& + k_{21}^2 \left( \frac{d}{dt} x_1(t) \right) k_{31}^2 k_{p4} k_{41} - k_{21} k_{41}^2 k_{e2}^2 k_{e1} x_1(t) k_{p4} \\
& + k_{p4} k_{41}^3 k_{e2}^2 k_{e1} x_1(t) - k_{21} k_{41}^2 k_{e1} x_1(t) k_{31}^2 k_{p4} \\
& + k_{21} k_{p4} k_{41}^3 \left( \frac{d}{dt} x_1(t) \right) k_{31} + k_{21} k_{p4} k_{41}^3 k_{e2} \left( \frac{d}{dt} x_1(t) \right) \\
& + k_{21} k_{p4} k_{41}^3 k_{e1} \left( \frac{d}{dt} x_1(t) \right) - k_{21}^2 k_{p4} k_{41}^2 k_{e2} k_{e1} x_1(t) \\
& + k_{21}^2 k_{p4} k_{41} k_{e2} \left( \frac{d}{dt} x_1(t) \right) k_{31} - k_{21}^2 k_{p4} k_{41}^2 k_{e1} x_1(t) k_{31} \\
& + k_{21}^2 k_{p4} k_{41} k_{e2} k_{e1} x_1(t) k_{31} - k_{21}^2 k_{p4} k_{41}^2 \left( \frac{d}{dt} x_1(t) \right) k_{31} \\
& - k_{21}^2 k_{p4} k_{41}^2 k_{e2} \left( \frac{d}{dt} x_1(t) \right) - k_{e2} \left( \frac{d}{dt} x_1(t) \right) k_{41}^2 k_{31}^2 k_{p4} \\
& + k_{21} k_{p4} k_{41}^3 k_{e1} x_1(t) k_{31} + k_{21} k_{p4} k_{41}^3 k_{e2} k_{e1} x_1(t) \\
& + k_{41}^2 k_{e2}^2 \left( \frac{d^2}{dt^2} x_1(t) \right) k_{p4} - k_{41} k_{p4} k_{e2}^3 \left( \frac{d^2}{dt^2} x_1(t) \right) \\
& + k_{p4} k_{41}^3 k_{e1} \left( \frac{d^2}{dt^2} x_1(t) \right) + k_{p4} k_{41}^2 k_{e1} \left( \frac{d^3}{dt^3} x_1(t) \right) \\
& + k_{p4} k_{41}^3 \left( \frac{d^2}{dt^2} x_1(t) \right) k_{31} - k_{41} \left( \frac{d^4}{dt^4} x_1(t) \right) k_{p4} k_{e2} \\
& - k_{21}^2 k_{31}^2 k_{p2} \left( \frac{d^2}{dt^2} x_1(t) \right) - k_{21}^2 k_{p2} k_{e2} \left( \frac{d^3}{dt^3} x_1(t) \right) \\
& - k_{21}^2 k_{p2} k_{e2}^2 \left( \frac{d^2}{dt^2} x_1(t) \right) - k_{21} k_{31} k_{p2} \left( \frac{d^4}{dt^4} x_1(t) \right) \\
& - k_{21} k_{31}^2 k_{p2} \left( \frac{d^3}{dt^3} x_1(t) \right) - k_{21} k_{p2} \left( \frac{d^4}{dt^4} x_1(t) \right) k_{e2} \\
& - k_{21} k_{p2} k_{e2}^3 \left( \frac{d^2}{dt^2} x_1(t) \right) - k_{31} k_{41} k_{p4} \left( \frac{d^4}{dt^4} x_1(t) \right) \\
& - k_{31} k_{p3} k_{e2}^3 \left( \frac{d^2}{dt^2} x_1(t) \right) - k_{31} \left( \frac{d^4}{dt^4} x_1(t) \right) k_{p3} k_{e2} \\
& - k_{31}^2 \left( \frac{d^3}{dt^3} x_1(t) \right) k_{p3} k_{e2} - k_{31}^2 k_{e2}^2 \left( \frac{d^2}{dt^2} x_1(t) \right) k_{p3}
\end{aligned}$$

$$\begin{aligned}
& -k_{31}^2 k_{p4} k_{41}^2 \left( \frac{d^2}{dt^2} x_1(t) \right) - k_{31}^2 k_{p4} k_{41} \left( \frac{d^3}{dt^3} x_1(t) \right) \\
& -k_{21}^2 k_{p4} k_{41}^2 \left( \frac{d^2}{dt^2} x_1(t) \right) - k_{21}^2 k_{p4} k_{41} \left( \frac{d^3}{dt^3} x_1(t) \right) \\
& -k_{21}^2 k_{p3} k_{31} \left( \frac{d^3}{dt^3} x_1(t) \right) - k_{21}^2 k_{p3} k_{31}^2 \left( \frac{d^2}{dt^2} x_1(t) \right) \\
& -k_{21} k_{41} k_{p4} \left( \frac{d^4}{dt^4} x_1(t) \right) - k_{21} k_{p3} k_{31} \left( \frac{d^4}{dt^4} x_1(t) \right) \\
& -k_{21}^2 k_{p2} \left( \frac{d^3}{dt^3} x_1(t) \right) k_{31} + k_{21} k_{p4} k_{41}^3 \left( \frac{d^2}{dt^2} x_1(t) \right) \\
& -k_{21} k_{p3} k_{31}^2 \left( \frac{d^3}{dt^3} x_1(t) \right) + 2 k_{41}^3 \left( \frac{d^2}{dt^2} x_1(t) \right) k_{p4} k_{e2} \\
& + 2 k_{41}^2 \left( \frac{d^3}{dt^3} x_1(t) \right) k_{p4} k_{e2} - 2 k_{41} k_{p4} k_{e2}^2 \left( \frac{d^3}{dt^3} x_1(t) \right) \\
& - 2 k_{21} k_{p2} k_{e2}^2 \left( \frac{d^3}{dt^3} x_1(t) \right) - 2 k_{31} k_{p3} k_{e2}^2 \left( \frac{d^3}{dt^3} x_1(t) \right) \\
& - 2 k_{21} k_{41}^2 k_{e1} x_1(t) k_{31} k_{p4} k_{e2} - 2 k_{21} k_{e2}^2 k_{e1} \left( \frac{d}{dt} x_1(t) \right) k_{p4} k_{41} \\
& - 2 k_{21} k_{e2}^2 k_{e1} \left( \frac{d}{dt} x_1(t) \right) k_{p3} k_{31} - 2 k_{21}^2 k_{31} k_{e2} k_{p2} k_{e1} \left( \frac{d}{dt} x_1(t) \right) \\
& + 2 k_{41}^3 k_{e1} \left( \frac{d}{dt} x_1(t) \right) k_{p4} k_{e2} - 2 k_{31} k_{41} k_{e2}^2 k_{e1} \left( \frac{d}{dt} x_1(t) \right) k_{p4} \\
& - 2 k_{21} k_{e1} \left( \frac{d}{dt} x_1(t) \right) k_{31}^2 k_{p3} k_{e2} - 2 k_{21} k_{41}^2 \left( \frac{d}{dt} x_1(t) \right) k_{31} k_{p4} k_{e2} \\
& - 2 k_{21} k_{31} k_{p2} k_{e2}^2 k_{e1} \left( \frac{d}{dt} x_1(t) \right) - k_{21} k_{e1} \left( \frac{d^2}{dt^2} x_1(t) \right) k_{p4} k_{41} k_{31} \\
& - k_{21} k_{41}^2 \left( \frac{d^2}{dt^2} x_1(t) \right) k_{p4} k_{31} - k_{21} \left( \frac{d^3}{dt^3} x_1(t) \right) k_{p4} k_{41} k_{31} \\
& - k_{21}^2 k_{p4} k_{41} k_{e1} \left( \frac{d^2}{dt^2} x_1(t) \right) - k_{21}^2 k_{p4} k_{41} k_{e2} \left( \frac{d^2}{dt^2} x_1(t) \right) \\
& - k_{21}^2 k_{p2} k_{e2} k_{e1} \left( \frac{d^2}{dt^2} x_1(t) \right) + k_{p4} k_{41}^3 \left( \frac{d^3}{dt^3} x_1(t) \right) + k_{p4} k_{41}^2 \left( \frac{d^4}{dt^4} x_1(t) \right) \\
& - k_{21} k_{p2} k_{e1} \left( \frac{d^3}{dt^3} x_1(t) \right) k_{e2} - k_{21} k_{31}^2 k_{p2} k_{e1} \left( \frac{d^2}{dt^2} x_1(t) \right) \\
& - k_{21} k_{31}^2 k_{e2} k_{p2} \left( \frac{d^2}{dt^2} x_1(t) \right) - k_{21}^2 k_{p3} k_{31} k_{e2} \left( \frac{d^2}{dt^2} x_1(t) \right) \\
& - k_{21}^2 k_{p3} k_{31} k_{e1} \left( \frac{d^2}{dt^2} x_1(t) \right) - k_{21} k_{41} k_{p4} k_{e1} \left( \frac{d^3}{dt^3} x_1(t) \right) \\
& - k_{21} k_{41}^2 \left( \frac{d^2}{dt^2} x_1(t) \right) k_{p4} k_{e2} - k_{31} k_{41}^2 \left( \frac{d^2}{dt^2} x_1(t) \right) k_{p4} k_{e2} \\
& - k_{31} k_{41} k_{p4} k_{e1} \left( \frac{d^3}{dt^3} x_1(t) \right) - k_{31} k_{e1} \left( \frac{d^3}{dt^3} x_1(t) \right) k_{p3} k_{e2} \\
& - k_{31}^2 k_{p4} k_{41} k_{e1} \left( \frac{d^2}{dt^2} x_1(t) \right) - k_{31}^2 k_{p4} k_{41} k_{e2} \left( \frac{d^2}{dt^2} x_1(t) \right) \\
& - k_{31}^2 k_{e1} \left( \frac{d^2}{dt^2} x_1(t) \right) k_{p3} k_{e2} - k_{41} k_{e1} \left( \frac{d^3}{dt^3} x_1(t) \right) k_{p4} k_{e2} \\
& - k_{21} k_{31} k_{p2} k_{e1} \left( \frac{d^3}{dt^3} x_1(t) \right) - k_{21} k_{e2} \left( \frac{d^2}{dt^2} x_1(t) \right) k_{p4} k_{41} k_{31} \\
& - k_{21} k_{p3} k_{31} k_{e1} \left( \frac{d^3}{dt^3} x_1(t) \right) - k_{21}^2 k_{p2} k_{e1} \left( \frac{d^2}{dt^2} x_1(t) \right) k_{31}
\end{aligned}$$

$$\begin{aligned}
& -k_{21} k_{p3} k_{31}^2 k_{e1} \left( \frac{d^2}{dt^2} x_1(t) \right) - 3 k_{21} \left( \frac{d^3}{dt^3} x_1(t) \right) k_{p4} k_{e2} k_{41} \\
& -3 k_{21} \left( \frac{d^3}{dt^3} x_1(t) \right) k_{p3} k_{e2} k_{31} - 2 k_{21} k_{e2}^2 \left( \frac{d^2}{dt^2} x_1(t) \right) k_{p3} k_{31} \\
& -2 k_{21} k_{e2}^2 \left( \frac{d^2}{dt^2} x_1(t) \right) k_{p4} k_{41} - 3 k_{21} k_{e1} \left( \frac{d^2}{dt^2} x_1(t) \right) k_{p4} k_{e2} k_{41} \\
& -3 k_{21} k_{e1} \left( \frac{d^2}{dt^2} x_1(t) \right) k_{p3} k_{e2} k_{31} - 2 k_{21}^2 k_{31} k_{e2} k_{p2} \left( \frac{d^2}{dt^2} x_1(t) \right) \\
& -2 k_{21} k_{p2} k_{e2}^2 k_{e1} \left( \frac{d^2}{dt^2} x_1(t) \right) - 2 k_{21} k_{31} k_{p2} k_{e2}^2 \left( \frac{d^2}{dt^2} x_1(t) \right) \\
& -3 k_{21} k_{31} k_{p2} k_{e2} \left( \frac{d^3}{dt^3} x_1(t) \right) - 2 k_{31} k_{41} k_{e2}^2 \left( \frac{d^2}{dt^2} x_1(t) \right) k_{p4} \\
& -3 k_{31} k_{41} \left( \frac{d^3}{dt^3} x_1(t) \right) k_{p4} k_{e2} - 3 k_{31} k_{41} k_{e1} \left( \frac{d^2}{dt^2} x_1(t) \right) k_{p4} k_{e2} \\
& -2 k_{31} k_{p3} k_{e2}^2 k_{e1} \left( \frac{d^2}{dt^2} x_1(t) \right) - 2 k_{21} \left( \frac{d^2}{dt^2} x_1(t) \right) k_{31}^2 k_{p3} k_{e2} \\
& + 2 k_{41}^2 k_{e1} \left( \frac{d^2}{dt^2} x_1(t) \right) k_{p4} k_{e2} - 2 k_{41} k_{p4} k_{e2}^2 k_{e1} \left( \frac{d^2}{dt^2} x_1(t) \right) \\
& - 3 k_{21} k_{31} k_{p2} k_{e2} k_{e1} \left( \frac{d^2}{dt^2} x_1(t) \right) / (k_{41} (k_{p3} k_{31} k_{41}^3 k_{e2} \\
& + k_{41}^2 k_{p3} k_{31} k_{e2}^2 + k_{21} k_{41}^3 k_{p3} k_{31} + k_{21} k_{p2} k_{41}^3 k_{e2} \\
& + k_{21} k_{p2} k_{41}^3 k_{31} + k_{21} k_{p2} k_{41}^2 k_{e2}^2 - k_{31}^2 k_{41}^2 k_{p4} k_{e2} \\
& - k_{21}^2 k_{41} k_{p2} k_{e2}^2 + k_{21}^2 k_{31} k_{p2} k_{e2}^2 - k_{21}^2 k_{41}^2 k_{p2} k_{e2} \\
& + k_{21}^2 k_{31}^2 k_{41} k_{p2} - k_{21}^2 k_{31} k_{41}^2 k_{p2} + k_{21}^2 k_{31}^2 k_{p2} k_{e2} \\
& - k_{21} k_{31}^2 k_{41}^2 k_{p2} + k_{31} k_{p4} k_{41}^3 k_{e2} - k_{31}^2 k_{41} k_{e2}^2 k_{p3} \\
& - k_{31}^2 k_{41}^2 k_{e2} k_{p3} - k_{21} k_{41}^2 k_{31}^2 k_{p4} + k_{21} k_{e2}^2 k_{p3} k_{31}^2 \\
& + k_{21} k_{p4} k_{41}^3 k_{31} + k_{21} k_{p4} k_{41}^3 k_{e2} - k_{31} k_{41}^2 k_{e2}^2 k_{p4} \\
& - k_{21} k_{41}^2 k_{31}^2 k_{p3} - k_{21}^2 k_{41}^2 k_{p3} k_{31} - k_{21} k_{41}^2 k_{e2}^2 k_{p4} \\
& - k_{21}^2 k_{41}^2 k_{31} k_{p4} + k_{21}^2 k_{41} k_{31}^2 k_{p3} + k_{21}^2 k_{e2} k_{31}^2 k_{p3} \\
& - k_{21}^2 k_{41}^2 k_{e2} k_{p4} + k_{21}^2 k_{p4} k_{41} k_{31}^2 + k_{p4} k_{41}^3 k_{e2}^2 \\
& - k_{21} k_{31}^2 k_{41} k_{p2} k_{e2} - k_{21} k_{31} k_{41} k_{p2} k_{e2}^2 + k_{21} k_{e2} k_{31}^2 k_{p4} k_{41} \\
& + k_{21}^2 k_{e2} k_{31} k_{p4} k_{41} + k_{21} k_{e2}^2 k_{p4} k_{41} k_{31} - k_{21} k_{41} k_{e2}^2 k_{p3} k_{31} \\
& - k_{p3} k_{21}^2 k_{31} k_{41} k_{e2} - 2 k_{21} k_{41}^2 k_{31} k_{p4} k_{e2})) - x_4(t) = 0
\end{aligned}$$

$$\begin{aligned}
C_{3,t} = & (2 k_{21} k_{41}^2 k_{e1} \left( \frac{d}{dt} x_1(t) \right) k_{p4} k_{e2} + k_{41}^2 k_{e2}^2 k_{e1} \left( \frac{d}{dt} x_1(t) \right) k_{p4} \\
& + k_{41} k_{p4} k_{e2}^3 k_{e1} \left( \frac{d}{dt} x_1(t) \right) + k_{21}^2 k_{p4} k_{41}^2 k_{e1} \left( \frac{d}{dt} x_1(t) \right) \\
& + k_{21}^2 k_{p4} k_{41} k_{e2} k_{e1} \left( \frac{d}{dt} x_1(t) \right) + k_{21}^2 k_{p2} k_{e2}^2 k_{e1} \left( \frac{d}{dt} x_1(t) \right) \\
& + k_{21}^2 k_{p3} k_{31}^2 k_{e1} \left( \frac{d}{dt} x_1(t) \right) + k_{21}^2 k_{p3} k_{31} k_{e2} k_{e1} \left( \frac{d}{dt} x_1(t) \right) \\
& + k_{31} k_{p3} k_{e2}^3 k_{e1} \left( \frac{d}{dt} x_1(t) \right) - k_{31}^2 k_{e2}^2 k_{e1} \left( \frac{d}{dt} x_1(t) \right) k_{p3} \\
& + k_{21} k_{p2} k_{e2}^3 k_{e1} \left( \frac{d}{dt} x_1(t) \right) + k_{41}^2 k_{e2}^2 \left( \frac{d^2}{dt^2} x_1(t) \right) k_{p4}
\end{aligned} \tag{3}$$

$$\begin{aligned}
& +k_{41} k_{p4} k_{e2}^3 \left( \frac{d^2}{dt^2} x_1(t) \right) + k_{41} \left( \frac{d^4}{dt^4} x_1(t) \right) k_{p4} k_{e2} \\
& +k_{21}^2 k_{p2} k_{e2} \left( \frac{d^3}{dt^3} x_1(t) \right) + k_{21}^2 k_{p2} k_{e2}^2 \left( \frac{d^2}{dt^2} x_1(t) \right) \\
& +k_{21} k_{p2} \left( \frac{d^4}{dt^4} x_1(t) \right) k_{e2} + k_{21} k_{p2} k_{e2}^3 \left( \frac{d^2}{dt^2} x_1(t) \right) \\
& +k_{31} k_{p3} k_{e2}^3 \left( \frac{d^2}{dt^2} x_1(t) \right) + k_{31} \left( \frac{d^4}{dt^4} x_1(t) \right) k_{p3} k_{e2} \\
& -2 k_{31}^2 \left( \frac{d^3}{dt^3} x_1(t) \right) k_{p3} k_{e2} - k_{31}^2 k_{e2}^2 \left( \frac{d^2}{dt^2} x_1(t) \right) k_{p3} \\
& +k_{21}^2 k_{p4} k_{41} \left( \frac{d^2}{dt^2} x_1(t) \right) + k_{21}^2 k_{p4} k_{41} \left( \frac{d^3}{dt^3} x_1(t) \right) \\
& +k_{21}^2 k_{p3} k_{31} \left( \frac{d^3}{dt^3} x_1(t) \right) + k_{21}^2 k_{p3} k_{31}^2 \left( \frac{d^2}{dt^2} x_1(t) \right) \\
& +k_{21} k_{41} k_{p4} \left( \frac{d^4}{dt^4} x_1(t) \right) + k_{21} k_{p3} k_{31} \left( \frac{d^4}{dt^4} x_1(t) \right) \\
& +k_{41}^2 \left( \frac{d^3}{dt^3} x_1(t) \right) k_{p4} k_{e2} + 2 k_{41} k_{p4} k_{e2}^2 \left( \frac{d^3}{dt^3} x_1(t) \right) \\
& +2 k_{21} k_{p2} k_{e2}^2 \left( \frac{d^3}{dt^3} x_1(t) \right) + 2 k_{31} k_{p3} k_{e2}^2 \left( \frac{d^3}{dt^3} x_1(t) \right) \\
& -k_{e2}^2 k_{p3} k_{31}^3 \left( \frac{d}{dt} x_1(t) \right) + 2 k_{21} k_{e2}^2 k_{e1} \left( \frac{d}{dt} x_1(t) \right) k_{p4} k_{41} \\
& +2 k_{21} k_{e2}^2 k_{e1} \left( \frac{d}{dt} x_1(t) \right) k_{p3} k_{31} + k_{21} k_{e1} \left( \frac{d}{dt} x_1(t) \right) k_{31}^2 k_{p3} k_{e2} \\
& +k_{21}^2 k_{p4} k_{41} k_{e1} \left( \frac{d^2}{dt^2} x_1(t) \right) + k_{21}^2 k_{p4} k_{41} k_{e2} \left( \frac{d^2}{dt^2} x_1(t) \right) \\
& +k_{21}^2 k_{p2} k_{e2} k_{e1} \left( \frac{d^2}{dt^2} x_1(t) \right) + k_{21} k_{p2} k_{e1} \left( \frac{d^3}{dt^3} x_1(t) \right) k_{e2} \\
& +k_{21}^2 k_{p3} k_{31} k_{e2} \left( \frac{d^2}{dt^2} x_1(t) \right) + k_{21}^2 k_{p3} k_{31} k_{e1} \left( \frac{d^2}{dt^2} x_1(t) \right) \\
& +k_{21} k_{41} k_{p4} k_{e1} \left( \frac{d^3}{dt^3} x_1(t) \right) + 2 k_{21} k_{41}^2 \left( \frac{d^2}{dt^2} x_1(t) \right) k_{p4} k_{e2} \\
& +k_{31} k_{e1} \left( \frac{d^3}{dt^3} x_1(t) \right) k_{p3} k_{e2} - 2 k_{31}^2 k_{e1} \left( \frac{d^2}{dt^2} x_1(t) \right) k_{p3} k_{e2} \\
& +k_{41} k_{e1} \left( \frac{d^3}{dt^3} x_1(t) \right) k_{p4} k_{e2} + k_{21} k_{p3} k_{31} k_{e1} \left( \frac{d^3}{dt^3} x_1(t) \right) \\
& +3 k_{21} \left( \frac{d^3}{dt^3} x_1(t) \right) k_{p4} k_{e2} k_{41} + 3 k_{21} \left( \frac{d^3}{dt^3} x_1(t) \right) k_{p3} k_{e2} k_{31} \\
& +2 k_{21} k_{e2}^2 \left( \frac{d^2}{dt^2} x_1(t) \right) k_{p3} k_{31} + 2 k_{21} k_{e2}^2 \left( \frac{d^2}{dt^2} x_1(t) \right) k_{p4} k_{41} \\
& +3 k_{21} k_{e1} \left( \frac{d^2}{dt^2} x_1(t) \right) k_{p4} k_{e2} k_{41} + 3 k_{21} k_{e1} \left( \frac{d^2}{dt^2} x_1(t) \right) k_{p3} k_{e2} k_{31} \\
& +2 k_{21} k_{p2} k_{e2}^2 k_{e1} \left( \frac{d^2}{dt^2} x_1(t) \right) + 2 k_{31} k_{p3} k_{e2}^2 k_{e1} \left( \frac{d^2}{dt^2} x_1(t) \right) \\
& +k_{21} \left( \frac{d^2}{dt^2} x_1(t) \right) k_{31}^2 k_{p3} k_{e2} + k_{41}^2 k_{e1} \left( \frac{d^2}{dt^2} x_1(t) \right) k_{p4} k_{e2} \\
& +2 k_{41} k_{p4} k_{e2}^2 k_{e1} \left( \frac{d^2}{dt^2} x_1(t) \right) + k_{41}^2 k_{e2} k_{e1} x_1(t) k_{31}^2 k_{p3} \\
& -k_{21} k_{e2}^2 \left( \frac{d}{dt} x_1(t) \right) k_{41} k_{p3} k_{31} + k_{21} k_{e2}^2 \left( \frac{d}{dt} x_1(t) \right) k_{31}^2 k_{p3}
\end{aligned}$$

$$\begin{aligned}
& +k_{41} k_{e1} x_1(t) k_{31}^2 k_{e2}^2 k_{p3} + k_{21}^2 k_{41}^2 k_{p2} k_{e1} \left( \frac{d}{dt} x_1(t) \right) \\
& -k_{21} k_{p3} k_{31}^3 k_{e2} k_{e1} x_1(t) - k_{21} k_{p3} k_{31}^3 k_{41} k_{e1} x_1(t) \\
& +k_{21}^2 k_{p3} k_{31}^2 k_{e2} \left( \frac{d}{dt} x_1(t) \right) + k_{21}^2 k_{p3} k_{31}^2 k_{41} \left( \frac{d}{dt} x_1(t) \right) \\
& +k_{21}^2 k_{p3} k_{31}^2 k_{41} k_{e1} x_1(t) - k_{21}^2 k_{p3} k_{31} k_{e2} \left( \frac{d}{dt} x_1(t) \right) k_{41} \\
& -k_{21}^2 k_{41}^2 k_{e1} x_1(t) k_{p3} k_{31} - k_{21}^2 k_{41}^2 \left( \frac{d}{dt} x_1(t) \right) k_{p3} k_{31} \\
& +k_{31} k_{41}^2 k_{e1} \left( \frac{d}{dt} x_1(t) \right) k_{p3} k_{e2} - k_{21} k_{e2} \left( \frac{d}{dt} x_1(t) \right) k_{41}^2 k_{p3} k_{31} \\
& +k_{21} k_{41}^2 k_{e1} x_1(t) k_{31}^2 k_{p3} + k_{21} k_{41} k_{e1} \left( \frac{d}{dt} x_1(t) \right) k_{p3} k_{e2} k_{31} \\
& +k_{21}^2 k_{p3} k_{31}^2 k_{e2} k_{e1} x_1(t) - k_{21}^2 k_{p3} k_{31} k_{41} k_{e2} k_{e1} x_1(t) \\
& -k_{21} k_{p3} k_{31}^3 k_{41} \left( \frac{d}{dt} x_1(t) \right) - k_{21} k_{p3} k_{31}^3 k_{e1} \left( \frac{d}{dt} x_1(t) \right) \\
& +k_{21} k_{e1} \left( \frac{d}{dt} x_1(t) \right) k_{31}^2 k_{41} k_{p3} + k_{31}^2 k_{41} k_{e1} \left( \frac{d}{dt} x_1(t) \right) k_{p3} k_{e2} \\
& +k_{31}^2 k_{41}^2 k_{p3} k_{e1} \left( \frac{d}{dt} x_1(t) \right) + k_{21} k_{41}^2 \left( \frac{d}{dt} x_1(t) \right) k_{31}^2 k_{p3} \\
& -k_{21} k_{e2}^2 k_{e1} x_1(t) k_{41} k_{p3} k_{31} + k_{21} k_{41}^2 k_{e2} k_{p2} k_{e1} \left( \frac{d}{dt} x_1(t) \right) \\
& -k_{21} k_{p3} k_{31}^3 k_{e2} \left( \frac{d}{dt} x_1(t) \right) - k_{p3} k_{31}^3 k_{41} k_{e2} \left( \frac{d}{dt} x_1(t) \right) \\
& +k_{21} k_{e2}^2 k_{e1} x_1(t) k_{31}^2 k_{p3} - k_{21} k_{41}^2 k_{e2} k_{e1} x_1(t) k_{p3} k_{31} \\
& +k_{41} \left( \frac{d}{dt} x_1(t) \right) k_{31}^2 k_{e2}^2 k_{p3} + k_{e2} \left( \frac{d}{dt} x_1(t) \right) k_{41}^2 k_{31}^2 k_{p3} \\
& -k_{e2}^2 k_{p3} k_{31}^3 k_{e1} x_1(t) - k_{p3} k_{31}^3 k_{41} k_{e2} k_{e1} x_1(t) \\
& -k_{p3} k_{31}^3 k_{41} k_{e1} \left( \frac{d}{dt} x_1(t) \right) - k_{p3} k_{31}^2 k_{e1} \left( \frac{d^3}{dt^3} x_1(t) \right) \\
& -k_{p3} k_{31}^3 k_{e1} \left( \frac{d^2}{dt^2} x_1(t) \right) + k_{21}^2 k_{41}^2 k_{p2} \left( \frac{d^2}{dt^2} x_1(t) \right) \\
& +k_{21} k_{41}^2 k_{p2} \left( \frac{d^3}{dt^3} x_1(t) \right) + k_{21} k_{41} k_{p2} \left( \frac{d^4}{dt^4} x_1(t) \right) \\
& +k_{31} k_{41}^2 k_{p3} \left( \frac{d^3}{dt^3} x_1(t) \right) + k_{31} k_{41} k_{p3} \left( \frac{d^4}{dt^4} x_1(t) \right) \\
& +k_{31}^2 k_{41}^2 k_{p3} \left( \frac{d^2}{dt^2} x_1(t) \right) + k_{21}^2 k_{p2} \left( \frac{d^3}{dt^3} x_1(t) \right) k_{41} \\
& +k_{21} k_{41}^2 k_{p4} \left( \frac{d^3}{dt^3} x_1(t) \right) - k_{21} k_{p3} k_{31}^3 \left( \frac{d^2}{dt^2} x_1(t) \right) \\
& -k_{p3} k_{31}^3 k_{41} \left( \frac{d^2}{dt^2} x_1(t) \right) - 2 \left( \frac{d^2}{dt^2} x_1(t) \right) k_{31}^3 k_{p3} k_{e2} \\
& +2 k_{21} k_{41} k_{e1} x_1(t) k_{31}^2 k_{p3} k_{e2} + 2 k_{21}^2 k_{41} k_{e2} k_{p2} k_{e1} \left( \frac{d}{dt} x_1(t) \right) \\
& +2 k_{31} k_{41} k_{e2}^2 k_{e1} \left( \frac{d}{dt} x_1(t) \right) k_{p3} + 2 k_{21} k_{41} \left( \frac{d}{dt} x_1(t) \right) k_{31}^2 k_{p3} k_{e2} \\
& +2 k_{21} k_{41} k_{p2} k_{e2}^2 k_{e1} \left( \frac{d}{dt} x_1(t) \right) - 2 k_{e1} \left( \frac{d}{dt} x_1(t) \right) k_{31}^3 k_{p3} k_{e2} \\
& -k_{p3} k_{31}^2 \left( \frac{d^4}{dt^4} x_1(t) \right) - k_{p3} k_{31}^3 \left( \frac{d^3}{dt^3} x_1(t) \right) + k_{21} k_{41}^2 k_{p2} k_{e1} \left( \frac{d^2}{dt^2} x_1(t) \right)
\end{aligned}$$

$$\begin{aligned}
& +k_{21} \left( \frac{d^3}{dt^3} x_1(t) \right) k_{41} k_{p3} k_{31} + k_{21} k_{41}^2 k_{p4} k_{e1} \left( \frac{d^2}{dt^2} x_1(t) \right) \\
& +k_{31} k_{41}^2 \left( \frac{d^2}{dt^2} x_1(t) \right) k_{p3} k_{e2} + k_{31} k_{41}^2 k_{p3} k_{e1} \left( \frac{d^2}{dt^2} x_1(t) \right) \\
& +k_{31} k_{41} k_{p3} k_{e1} \left( \frac{d^3}{dt^3} x_1(t) \right) + k_{21} k_{e2} \left( \frac{d^2}{dt^2} x_1(t) \right) k_{41} k_{p3} k_{31} \\
& +k_{21} k_{e1} \left( \frac{d^2}{dt^2} x_1(t) \right) k_{41} k_{p3} k_{31} + k_{21}^2 k_{p2} k_{e1} \left( \frac{d^2}{dt^2} x_1(t) \right) k_{41} \\
& +k_{31}^2 k_{41} \left( \frac{d^2}{dt^2} x_1(t) \right) k_{p3} k_{e2} + k_{21} \left( \frac{d^2}{dt^2} x_1(t) \right) k_{31}^2 k_{41} k_{p3} \\
& +k_{21} k_{41}^2 k_{e2} k_{p2} \left( \frac{d^2}{dt^2} x_1(t) \right) + k_{21} k_{41} k_{p2} k_{e1} \left( \frac{d^3}{dt^3} x_1(t) \right) \\
& +2 k_{21}^2 k_{41} k_{e2} k_{p2} \left( \frac{d^2}{dt^2} x_1(t) \right) + 2 k_{31} k_{41} k_{e2}^2 \left( \frac{d^2}{dt^2} x_1(t) \right) k_{p3} \\
& +3 k_{31} k_{41} k_{e1} \left( \frac{d^2}{dt^2} x_1(t) \right) k_{p3} k_{e2} + 3 k_{31} k_{41} \left( \frac{d^3}{dt^3} x_1(t) \right) k_{p3} k_{e2} \\
& +3 k_{21} k_{41} k_{p2} k_{e2} \left( \frac{d^3}{dt^3} x_1(t) \right) + 3 k_{21} k_{41} k_{p2} k_{e2} k_{e1} \left( \frac{d^2}{dt^2} x_1(t) \right) \\
& +2 k_{21} k_{41} k_{p2} k_{e2}^2 \left( \frac{d^2}{dt^2} x_1(t) \right) / (k_{31} (k_{31}^2 k_{41}^2 k_{p4} k_{e2} \\
& -k_{21}^2 k_{41} k_{p2} k_{e2}^2 + k_{21}^2 k_{31} k_{p2} k_{e2}^2 - k_{21}^2 k_{41}^2 k_{p2} k_{e2} \\
& +k_{21}^2 k_{31}^2 k_{41} k_{p2} - k_{21}^2 k_{31} k_{41}^2 k_{p2} + k_{21}^2 k_{31}^2 k_{p2} k_{e2} \\
& +k_{21} k_{31}^2 k_{41}^2 k_{p2} + k_{31}^2 k_{41} k_{e2}^2 k_{p3} + k_{31}^2 k_{41}^2 k_{e2} k_{p3} \\
& +k_{21} k_{41}^2 k_{31}^2 k_{p4} + k_{21} k_{e2}^2 k_{p3} k_{31}^2 + k_{31} k_{41}^2 k_{e2}^2 k_{p4} \\
& +k_{21} k_{41}^2 k_{31}^2 k_{p3} - k_{21}^2 k_{41}^2 k_{p3} k_{31} - k_{21} k_{41}^2 k_{e2}^2 k_{p4} \\
& -k_{21}^2 k_{41}^2 k_{31} k_{p4} + k_{21}^2 k_{41} k_{31}^2 k_{p3} + k_{21}^2 k_{e2} k_{31}^2 k_{p3} \\
& -k_{21}^2 k_{41}^2 k_{e2} k_{p4} + k_{21}^2 k_{p4} k_{41} k_{31}^2 - k_{p3} k_{31}^3 k_{e2} \\
& +k_{21} k_{31} k_{41} k_{p2} k_{e2}^2 + k_{21}^2 k_{e2} k_{31} k_{p4} k_{41} + k_{21} k_{e2}^2 k_{p4} k_{41} k_{31} \\
& -k_{21} k_{41} k_{e2}^2 k_{p3} k_{31} - k_{p3} k_{21}^2 k_{31} k_{41} k_{e2} + k_{21} k_{31} k_{41}^2 k_{p2} k_{e2} \\
& -k_{21} k_{p2} k_{31}^3 k_{41} - k_{21} k_{p2} k_{31}^3 k_{e2} - k_{21} k_{p3} k_{31}^3 k_{41} \\
& -k_{21} k_{p3} k_{31}^3 k_{e2} - k_{21} k_{31}^3 k_{p4} k_{41} - k_{21} k_{31}^2 k_{e2}^2 k_{p2} \\
& -k_{p3} k_{31}^3 k_{41} k_{e2} - k_{31}^3 k_{p4} k_{41} k_{e2} - k_{31}^2 k_{p4} k_{e2}^2 k_{41} \\
& -k_{21} k_{41}^2 k_{e2} k_{p3} k_{31} + 2 k_{p3} k_{21} k_{31}^2 k_{41} k_{e2}) - x_3(t) = 0
\end{aligned}$$

$$\begin{aligned}
C_{4,t} = & (-k_{41}^2 k_{e2}^2 k_{e1} \left( \frac{d}{dt} x_1(t) \right) k_{p4} - k_{41} k_{p4} k_{e2}^3 k_{e1} \left( \frac{d}{dt} x_1(t) \right) \\
& +k_{21}^2 k_{p2} k_{e2}^2 k_{e1} \left( \frac{d}{dt} x_1(t) \right) - k_{21}^2 k_{31}^2 k_{p2} k_{e1} \left( \frac{d}{dt} x_1(t) \right) \\
& -2 k_{31} k_{41}^2 k_{e1} \left( \frac{d}{dt} x_1(t) \right) k_{p4} k_{e2} - k_{31} k_{p3} k_{e2}^3 k_{e1} \left( \frac{d}{dt} x_1(t) \right) \\
& -k_{31}^2 k_{p4} k_{41}^2 k_{e1} \left( \frac{d}{dt} x_1(t) \right) - k_{31}^2 k_{p4} k_{41} k_{e2} k_{e1} \left( \frac{d}{dt} x_1(t) \right) \\
& -k_{31}^2 k_{e2}^2 k_{e1} \left( \frac{d}{dt} x_1(t) \right) k_{p3} - k_{21} k_{31}^2 k_{e2} k_{p2} k_{e1} \left( \frac{d}{dt} x_1(t) \right) \\
& -k_{21} k_{p2} k_{e2}^3 k_{e1} \left( \frac{d}{dt} x_1(t) \right) - k_{41}^2 k_{e2}^2 \left( \frac{d^2}{dt^2} x_1(t) \right) k_{p4}
\end{aligned} \tag{4}$$

$$\begin{aligned}
& -k_{41} k_{p4} k_{e2}^3 \left( \frac{d^2}{dt^2} x_1(t) \right) - k_{41} \left( \frac{d^4}{dt^4} x_1(t) \right) k_{p4} k_{e2} \\
& -k_{21}^2 k_{31}^2 k_{p2} \left( \frac{d^2}{dt^2} x_1(t) \right) + 2 k_{21}^2 k_{p2} k_{e2} \left( \frac{d^3}{dt^3} x_1(t) \right) \\
& + k_{21}^2 k_{p2} k_{e2}^2 \left( \frac{d^2}{dt^2} x_1(t) \right) - k_{21} k_{31} k_{p2} \left( \frac{d^4}{dt^4} x_1(t) \right) \\
& -k_{21} k_{31}^2 k_{p2} \left( \frac{d^3}{dt^3} x_1(t) \right) - k_{21} k_{p2} \left( \frac{d^4}{dt^4} x_1(t) \right) k_{e2} \\
& -k_{21} k_{p2} k_{e2}^3 \left( \frac{d^2}{dt^2} x_1(t) \right) - k_{31} k_{41} k_{p4} \left( \frac{d^4}{dt^4} x_1(t) \right) \\
& -k_{31} k_{p3} k_{e2}^3 \left( \frac{d^2}{dt^2} x_1(t) \right) - k_{31} \left( \frac{d^4}{dt^4} x_1(t) \right) k_{p3} k_{e2} \\
& -k_{31}^2 \left( \frac{d^3}{dt^3} x_1(t) \right) k_{p3} k_{e2} - k_{31}^2 k_{e2}^2 \left( \frac{d^2}{dt^2} x_1(t) \right) k_{p3} \\
& -k_{31}^2 k_{p4} k_{41}^2 \left( \frac{d^2}{dt^2} x_1(t) \right) - k_{31}^2 k_{p4} k_{41} \left( \frac{d^3}{dt^3} x_1(t) \right) \\
& -k_{41}^2 \left( \frac{d^3}{dt^3} x_1(t) \right) k_{p4} k_{e2} - 2 k_{41} k_{p4} k_{e2}^2 \left( \frac{d^3}{dt^3} x_1(t) \right) \\
& -2 k_{21} k_{p2} k_{e2}^2 \left( \frac{d^3}{dt^3} x_1(t) \right) - 2 k_{31} k_{p3} k_{e2}^2 \left( \frac{d^3}{dt^3} x_1(t) \right) \\
& -k_{21}^2 k_{31} k_{e2} k_{p2} k_{e1} \left( \frac{d}{dt} x_1(t) \right) - 2 k_{31} k_{41} k_{e2}^2 k_{e1} \left( \frac{d}{dt} x_1(t) \right) k_{p4} \\
& -2 k_{21} k_{31} k_{p2} k_{e2}^2 k_{e1} \left( \frac{d}{dt} x_1(t) \right) + 2 k_{21}^2 k_{p2} k_{e2} k_{e1} \left( \frac{d^2}{dt^2} x_1(t) \right) \\
& -k_{21} k_{p2} k_{e1} \left( \frac{d^3}{dt^3} x_1(t) \right) k_{e2} - k_{21} k_{31}^2 k_{p2} k_{e1} \left( \frac{d^2}{dt^2} x_1(t) \right) \\
& -k_{21} k_{31}^2 k_{e2} k_{p2} \left( \frac{d^2}{dt^2} x_1(t) \right) - 2 k_{31} k_{41}^2 \left( \frac{d^2}{dt^2} x_1(t) \right) k_{p4} k_{e2} \\
& -k_{31} k_{41} k_{p4} k_{e1} \left( \frac{d^3}{dt^3} x_1(t) \right) - k_{31} k_{e1} \left( \frac{d^3}{dt^3} x_1(t) \right) k_{p3} k_{e2} \\
& -k_{31}^2 k_{p4} k_{41} k_{e1} \left( \frac{d^2}{dt^2} x_1(t) \right) - k_{31}^2 k_{p4} k_{41} k_{e2} \left( \frac{d^2}{dt^2} x_1(t) \right) \\
& -k_{31}^2 k_{e1} \left( \frac{d^2}{dt^2} x_1(t) \right) k_{p3} k_{e2} - k_{41} k_{e1} \left( \frac{d^3}{dt^3} x_1(t) \right) k_{p4} k_{e2} \\
& -k_{21} k_{31} k_{p2} k_{e1} \left( \frac{d^3}{dt^3} x_1(t) \right) - k_{21}^2 k_{31} k_{e2} k_{p2} \left( \frac{d^2}{dt^2} x_1(t) \right) \\
& -2 k_{21} k_{p2} k_{e2}^2 k_{e1} \left( \frac{d^2}{dt^2} x_1(t) \right) - 2 k_{21} k_{31} k_{p2} k_{e2}^2 \left( \frac{d^2}{dt^2} x_1(t) \right) \\
& -3 k_{21} k_{31} k_{p2} k_{e2} \left( \frac{d^3}{dt^3} x_1(t) \right) - 2 k_{31} k_{41} k_{e2}^2 \left( \frac{d^2}{dt^2} x_1(t) \right) k_{p4} \\
& -3 k_{31} k_{41} \left( \frac{d^3}{dt^3} x_1(t) \right) k_{p4} k_{e2} - 3 k_{31} k_{41} k_{e1} \left( \frac{d^2}{dt^2} x_1(t) \right) k_{p4} k_{e2} \\
& -2 k_{31} k_{p3} k_{e2}^2 k_{e1} \left( \frac{d^2}{dt^2} x_1(t) \right) - k_{41}^2 k_{e1} \left( \frac{d^2}{dt^2} x_1(t) \right) k_{p4} k_{e2} \\
& -2 k_{41} k_{p4} k_{e2}^2 k_{e1} \left( \frac{d^2}{dt^2} x_1(t) \right) - 3 k_{21} k_{31} k_{p2} k_{e2} k_{e1} \left( \frac{d^2}{dt^2} x_1(t) \right) \\
& -k_{21}^2 k_{41}^2 k_{p2} k_{e1} \left( \frac{d}{dt} x_1(t) \right) - k_{31} k_{41}^2 k_{e1} \left( \frac{d}{dt} x_1(t) \right) k_{p3} k_{e2} \\
& -2 k_{31}^2 k_{41} k_{e1} \left( \frac{d}{dt} x_1(t) \right) k_{p3} k_{e2} - k_{31}^2 k_{41}^2 k_{p3} k_{e1} \left( \frac{d}{dt} x_1(t) \right)
\end{aligned}$$



$$\begin{aligned}
& -k_{21} k_{41}^2 k_{e2} k_{p2} k_{e1} \left( \frac{d}{dt} x_1(t) \right) - k_{21}^2 k_{41}^2 k_{p2} \left( \frac{d^2}{dt^2} x_1(t) \right) \\
& -k_{21} k_{41}^2 k_{p2} \left( \frac{d^3}{dt^3} x_1(t) \right) - k_{21} k_{41} k_{p2} \left( \frac{d^4}{dt^4} x_1(t) \right) \\
& -k_{31} k_{41}^2 k_{p3} \left( \frac{d^3}{dt^3} x_1(t) \right) - k_{31} k_{41} k_{p3} \left( \frac{d^4}{dt^4} x_1(t) \right) \\
& -k_{31}^2 k_{41}^2 k_{p3} \left( \frac{d^2}{dt^2} x_1(t) \right) + k_{21}^3 k_{e2}^2 k_{p2} \left( \frac{d}{dt} x_1(t) \right) \\
& -k_{21}^2 k_{41} k_{e2} k_{p2} k_{e1} \left( \frac{d}{dt} x_1(t) \right) - 2 k_{31} k_{41} k_{e2}^2 k_{e1} \left( \frac{d}{dt} x_1(t) \right) k_{p3} \\
& -2 k_{21} k_{41} k_{p2} k_{e2}^2 k_{e1} \left( \frac{d}{dt} x_1(t) \right) - k_{21} k_{41}^2 k_{p2} k_{e1} \left( \frac{d^2}{dt^2} x_1(t) \right) \\
& -k_{31} k_{41}^2 \left( \frac{d^2}{dt^2} x_1(t) \right) k_{p3} k_{e2} - k_{31} k_{41}^2 k_{p3} k_{e1} \left( \frac{d^2}{dt^2} x_1(t) \right) \\
& -k_{31} k_{41} k_{p3} k_{e1} \left( \frac{d^3}{dt^3} x_1(t) \right) - 2 k_{31}^2 k_{41} \left( \frac{d^2}{dt^2} x_1(t) \right) k_{p3} k_{e2} \\
& -k_{21} k_{41}^2 k_{e2} k_{p2} \left( \frac{d^2}{dt^2} x_1(t) \right) - k_{21} k_{41} k_{p2} k_{e1} \left( \frac{d^3}{dt^3} x_1(t) \right) \\
& -k_{21}^2 k_{41} k_{e2} k_{p2} \left( \frac{d^2}{dt^2} x_1(t) \right) - 2 k_{31} k_{41} k_{e2}^2 \left( \frac{d^2}{dt^2} x_1(t) \right) k_{p3} \\
& -3 k_{31} k_{41} k_{e1} \left( \frac{d^2}{dt^2} x_1(t) \right) k_{p3} k_{e2} - 3 k_{31} k_{41} \left( \frac{d^3}{dt^3} x_1(t) \right) k_{p3} k_{e2} \\
& -3 k_{21} k_{41} k_{p2} k_{e2} \left( \frac{d^3}{dt^3} x_1(t) \right) - 3 k_{21} k_{41} k_{p2} k_{e2} k_{e1} \left( \frac{d^2}{dt^2} x_1(t) \right) \\
& -2 k_{21} k_{41} k_{p2} k_{e2}^2 \left( \frac{d^2}{dt^2} x_1(t) \right) + k_{21}^3 k_{p2} k_{e1} \left( \frac{d}{dt} x_1(t) \right) k_{31} \\
& + k_{21}^3 k_{p2} k_{41} \left( \frac{d}{dt} x_1(t) \right) k_{31} + k_{21}^3 k_{e2} k_{p2} \left( \frac{d}{dt} x_1(t) \right) k_{41} \\
& + k_{21}^3 k_{p2} k_{41} k_{e1} \left( \frac{d}{dt} x_1(t) \right) + k_{21}^3 k_{41} k_{e2} k_{p2} k_{e1} x_1(t) \\
& + k_{21}^3 k_{p2} k_{41} k_{e1} x_1(t) k_{31} + k_{21}^3 k_{e2}^2 k_{p2} k_{e1} x_1(t) \\
& + k_{21}^3 k_{e2} k_{p2} \left( \frac{d}{dt} x_1(t) \right) k_{31} + k_{21}^3 k_{e2} k_{p2} k_{e1} x_1(t) k_{31} \\
& -k_{21}^2 k_{41} k_{e2}^2 k_{p2} k_{e1} x_1(t) - k_{21}^2 k_{41}^2 k_{p2} k_{e2} k_{e1} x_1(t) \\
& + k_{21}^3 k_{p2} k_{e1} \left( \frac{d^2}{dt^2} x_1(t) \right) + k_{21}^3 k_{p2} k_{41} \left( \frac{d^2}{dt^2} x_1(t) \right) \\
& + k_{21}^3 k_{p2} \left( \frac{d^2}{dt^2} x_1(t) \right) k_{31} - k_{21}^2 k_{31} k_{p2} k_{41} k_{e1} \left( \frac{d}{dt} x_1(t) \right) \\
& -k_{21}^2 k_{41}^2 k_{p2} k_{e2} \left( \frac{d}{dt} x_1(t) \right) - k_{21}^2 k_{41} k_{e2}^2 k_{p2} \left( \frac{d}{dt} x_1(t) \right) \\
& -k_{21}^2 k_{31} k_{e2}^2 k_{p2} k_{e1} x_1(t) - k_{21}^2 k_{31} k_{41}^2 k_{p2} k_{e1} x_1(t) \\
& -k_{21}^2 k_{31}^2 k_{41} k_{p2} k_{e1} x_1(t) - k_{21}^2 k_{31}^2 k_{p2} k_{e2} k_{e1} x_1(t) \\
& -k_{21}^2 k_{31} k_{41}^2 k_{p2} \left( \frac{d}{dt} x_1(t) \right) - k_{21}^2 k_{31} k_{e2}^2 k_{p2} \left( \frac{d}{dt} x_1(t) \right) \\
& -k_{21}^2 k_{31}^2 k_{41} k_{p2} \left( \frac{d}{dt} x_1(t) \right) - k_{21}^2 k_{31}^2 k_{p2} k_{e2} \left( \frac{d}{dt} x_1(t) \right) \\
& -k_{21} k_{31} k_{41} k_{e2} k_{p2} k_{e1} \left( \frac{d}{dt} x_1(t) \right) + k_{21} k_{31} k_{41} k_{e2}^2 k_{p2} k_{e1} x_1(t)
\end{aligned}$$

$$\begin{aligned}
& +k_{21} k_{31} k_{41}^2 k_{p2} k_{e2} \left( \frac{d}{dt} x_1(t) \right) + k_{21} k_{31} k_{41} k_{e2}^2 k_{p2} \left( \frac{d}{dt} x_1(t) \right) \\
& +k_{21} k_{31} k_{41}^2 k_{p2} k_{e2} k_{e1} x_1(t) + k_{21} k_{31}^2 k_{e2} k_{p2} \left( \frac{d}{dt} x_1(t) \right) k_{41} \\
& +k_{21} k_{31}^2 k_{41} k_{e2} k_{p2} k_{e1} x_1(t) + k_{21} k_{31}^2 k_{41}^2 k_{p2} k_{e1} x_1(t) \\
& +k_{21} k_{31}^2 k_{41}^2 k_{p2} \left( \frac{d}{dt} x_1(t) \right) + 2 k_{21}^3 k_{e2} k_{p2} k_{e1} \left( \frac{d}{dt} x_1(t) \right) \\
& -2 k_{21}^2 k_{31} k_{e2} k_{p2} \left( \frac{d}{dt} x_1(t) \right) k_{41} - 2 k_{21}^2 k_{31} k_{41} k_{e2} k_{p2} k_{e1} x_1(t) \\
& +k_{21}^2 k_{p2} \left( \frac{d^4}{dt^4} x_1(t) \right) + k_{21}^3 k_{p2} \left( \frac{d^3}{dt^3} x_1(t) \right) + k_{21}^2 k_{p2} k_{e1} \left( \frac{d^3}{dt^3} x_1(t) \right) \\
& -k_{31} k_{41}^2 k_{p4} \left( \frac{d^3}{dt^3} x_1(t) \right) - k_{31}^2 k_{41} k_{p3} \left( \frac{d^3}{dt^3} x_1(t) \right) \\
& +2 k_{21}^3 k_{e2} k_{p2} \left( \frac{d^2}{dt^2} x_1(t) \right) - k_{21}^2 k_{31} k_{p2} k_{41} \left( \frac{d^2}{dt^2} x_1(t) \right) \\
& -k_{31} k_{41}^2 k_{p4} k_{e1} \left( \frac{d^2}{dt^2} x_1(t) \right) - k_{31}^2 k_{41} k_{p3} k_{e1} \left( \frac{d^2}{dt^2} x_1(t) \right) \\
& -k_{21} k_{31} k_{41} k_{p2} k_{e1} \left( \frac{d^2}{dt^2} x_1(t) \right) - k_{21} k_{31} k_{41} k_{e2} k_{p2} \left( \frac{d^2}{dt^2} x_1(t) \right) \\
& -k_{21} k_{31} k_{41} k_{p2} \left( \frac{d^3}{dt^3} x_1(t) \right) / (k_{21} (k_{31}^2 k_{41}^2 k_{p4} k_{e2} \\
& -k_{21}^2 k_{41} k_{p2} k_{e2}^2 - k_{21}^2 k_{31} k_{p2} k_{e2}^2 - k_{21}^2 k_{41}^2 k_{p2} k_{e2} \\
& -k_{21}^2 k_{31}^2 k_{41} k_{p2} - k_{21}^2 k_{31} k_{41}^2 k_{p2} - k_{21}^2 k_{31}^2 k_{p2} k_{e2} \\
& +k_{21} k_{31}^2 k_{41}^2 k_{p2} + k_{31}^2 k_{41} k_{e2}^2 k_{p3} + k_{31}^2 k_{41}^2 k_{e2} k_{p3} \\
& +k_{21} k_{41}^2 k_{31}^2 k_{p4} - k_{21} k_{e2}^2 k_{p3} k_{31}^2 + k_{31} k_{41}^2 k_{e2}^2 k_{p4} \\
& +k_{21} k_{41}^2 k_{31}^2 k_{p3} - k_{21}^2 k_{41}^2 k_{p3} k_{31} - k_{21} k_{41}^2 k_{e2}^2 k_{p4} \\
& -k_{21}^2 k_{41}^2 k_{31} k_{p4} - k_{21}^2 k_{41} k_{31}^2 k_{p3} - k_{21}^2 k_{e2} k_{31}^2 k_{p3} \\
& -k_{21}^2 k_{41}^2 k_{e2} k_{p4} - k_{21}^2 k_{p4} k_{41} k_{31}^2 + k_{21} k_{31}^2 k_{41} k_{p2} k_{e2} \\
& +k_{21} k_{31} k_{41} k_{p2} k_{e2}^2 - k_{21} k_{e2} k_{31}^2 k_{p4} k_{41} - k_{21} k_{e2}^2 k_{p4} k_{41} k_{31} \\
& -k_{21} k_{41} k_{e2}^2 k_{p3} k_{31} + k_{21}^3 k_{p2} k_{e2}^2 + k_{21} k_{31} k_{41}^2 k_{p2} k_{e2} \\
& -k_{21} k_{41}^2 k_{e2} k_{p3} k_{31} + k_{21}^3 k_{31} k_{p2} k_{e2} + k_{21}^3 k_{41} k_{p2} k_{e2} \\
& +k_{21}^3 k_{31} k_{41} k_{p2} + k_{21}^2 k_{p4} k_{e2}^2 k_{41} + k_{21}^2 k_{p3} k_{e2}^2 k_{31} \\
& +k_{21}^3 k_{e2} k_{p4} k_{41} + k_{21}^3 k_{e2} k_{p3} k_{31} + k_{21}^3 k_{41} k_{p3} k_{31} \\
& +k_{21}^3 k_{p4} k_{41} k_{31} - 2 k_{21}^2 k_{31} k_{41} k_{p2} k_{e2})) - x_2(t) = 0
\end{aligned}$$

$$\begin{aligned}
C_{5,t} = & -\left( \frac{d^3}{dt^3} x_1(t) \right) k_{21} k_{41} - \left( \frac{d^4}{dt^4} x_1(t) \right) k_{e1} - \left( \frac{d^4}{dt^4} x_1(t) \right) k_{21} \\
& -\left( \frac{d^4}{dt^4} x_1(t) \right) k_{31} - \left( \frac{d^4}{dt^4} x_1(t) \right) k_{41} - \left( \frac{d^2}{dt^2} x_1(t) \right) k_{e2}^3 - 3 \left( \frac{d^3}{dt^3} x_1(t) \right) k_{e2}^2 \\
& -3 \left( \frac{d^4}{dt^4} x_1(t) \right) k_{e2} - k_{e1} \left( \frac{d}{dt} x_1(t) \right) k_{e2}^3 - \left( \frac{d^2}{dt^2} x_1(t) \right) k_{41} k_{e2}^2 \\
& -k_{e1} \left( \frac{d}{dt} x_1(t) \right) k_{21} k_{e2}^2 - k_{e1} \left( \frac{d}{dt} x_1(t) \right) k_{41} k_{e2}^2 \\
& -k_{e1} \left( \frac{d}{dt} x_1(t) \right) k_{31} k_{e2}^2 - k_{e1} \left( \frac{d^2}{dt^2} x_1(t) \right) k_{21} k_{41}
\end{aligned} \tag{5}$$

$$\begin{aligned}
& -k_{e1} \left( \frac{d^2}{dt^2} x_1(t) \right) k_{21} k_{31} - k_{e1} \left( \frac{d^2}{dt^2} x_1(t) \right) k_{41} k_{31} \\
& - \left( \frac{d^2}{dt^2} x_1(t) \right) k_{41} k_{31} k_{21} - \left( \frac{d^2}{dt^2} x_1(t) \right) k_{41} k_{e2} k_{21} \\
& - \left( \frac{d^2}{dt^2} x_1(t) \right) k_{31} k_{e2} k_{21} - \left( \frac{d^2}{dt^2} x_1(t) \right) k_{41} k_{e2} k_{31} \\
& - 2 k_{e1} \left( \frac{d^2}{dt^2} x_1(t) \right) k_{21} k_{e2} - 2 k_{e1} \left( \frac{d^2}{dt^2} x_1(t) \right) k_{41} k_{e2} \\
& - 2 k_{e1} \left( \frac{d^2}{dt^2} x_1(t) \right) k_{31} k_{e2} - k_{e1} \left( \frac{d}{dt} x_1(t) \right) k_{31} k_{e2} k_{21} \\
& - k_{e1} \left( \frac{d}{dt} x_1(t) \right) k_{41} k_{e2} k_{31} - k_{e1} \left( \frac{d}{dt} x_1(t) \right) k_{41} k_{31} k_{21} \\
& - k_{e1} \left( \frac{d}{dt} x_1(t) \right) k_{41} k_{e2} k_{21} - k_{e1} \left( \frac{d^3}{dt^3} x_1(t) \right) k_{31} - k_{e1} \left( \frac{d^3}{dt^3} x_1(t) \right) k_{21} \\
& - k_{e1} \left( \frac{d^3}{dt^3} x_1(t) \right) k_{41} - \left( \frac{d^2}{dt^2} x_1(t) \right) k_{21} k_{e2}^2 - \left( \frac{d^2}{dt^2} x_1(t) \right) k_{31} k_{e2}^2 \\
& - \left( \frac{d^3}{dt^3} x_1(t) \right) k_{21} k_{31} - \left( \frac{d^3}{dt^3} x_1(t) \right) k_{41} k_{31} - 3 k_{e1} \left( \frac{d^2}{dt^2} x_1(t) \right) k_{e2}^2 \\
& - 3 k_{e1} \left( \frac{d^3}{dt^3} x_1(t) \right) k_{e2} - 2 \left( \frac{d^3}{dt^3} x_1(t) \right) k_{21} k_{e2} - 2 \left( \frac{d^3}{dt^3} x_1(t) \right) k_{41} k_{e2} \\
& - 2 \left( \frac{d^3}{dt^3} x_1(t) \right) k_{31} k_{e2} - \frac{d^5}{dt^5} x_1(t) = 0
\end{aligned}$$
